# Supplementary material
Source: PubMed Central journal article supplement (PMC6955216)
Supplement: develop-146-179820-s1.pdf [file develop-146-179820-s1.pdf]

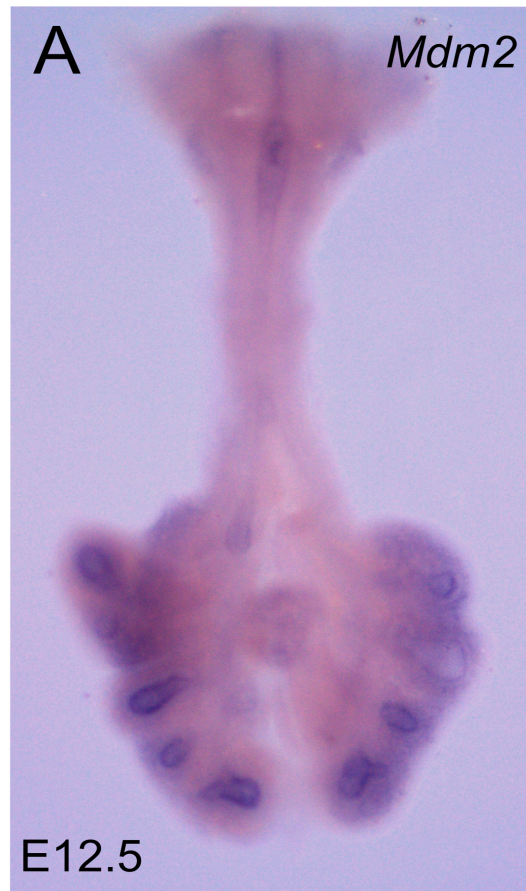

**Figure S1. *Mdm2* is primarily expressed in epithelial cells in the developing lung.**

(A) *Mdm2* RNA in situ hybridization staining of lung at E12.5. Staining data in this figure are representative from n = 3 embryos of each genotype.

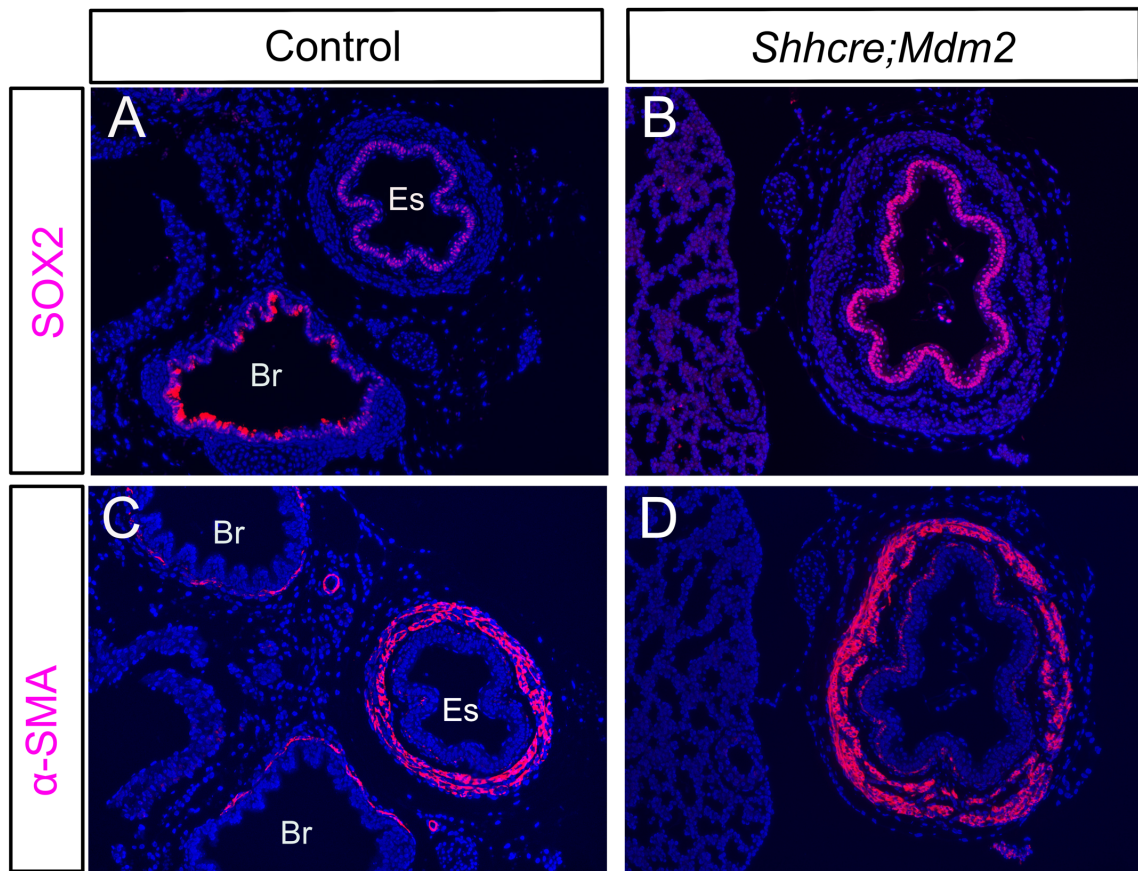

**Figure S2. *Mdm2* mutant foregut exhibit fused tube with both trachea and esophagus characteristics.**

(A,B) Anti-SOX2 staining in control and *Shhcre;Mdm2* mutants. (C,D) Anti- $\alpha$ -SMA staining in control and *Shhcre;Mdm2* mutants. Staining data in this figure are representative from n = 3 embryos of each genotype.

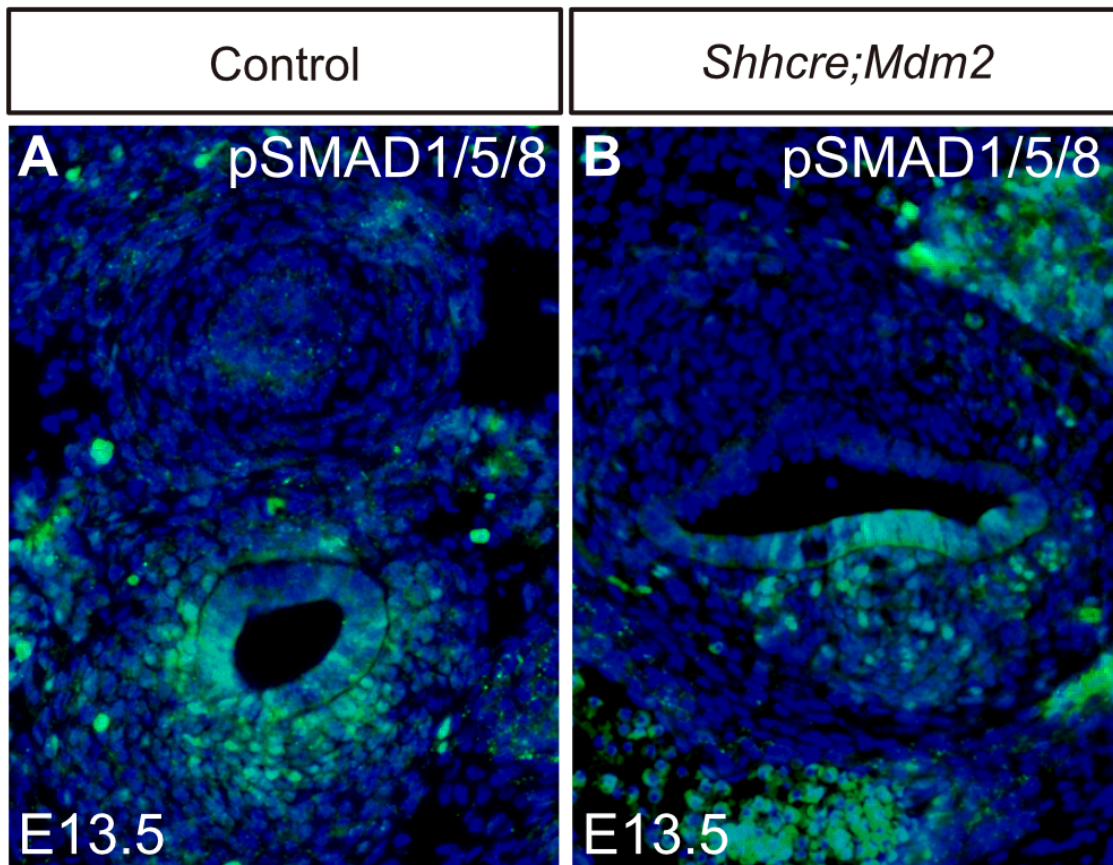

**Figure S3. BMP activity readout pSMAD 1/5/8 expression remained present in the *Mdm2* mutant.** (A,B) Anti-pSMAD1/5/8 staining in the foregut of *Mdm2* mutant and control at E13.5. Staining data in this figure are representative from n = 3 embryos of each genotype.

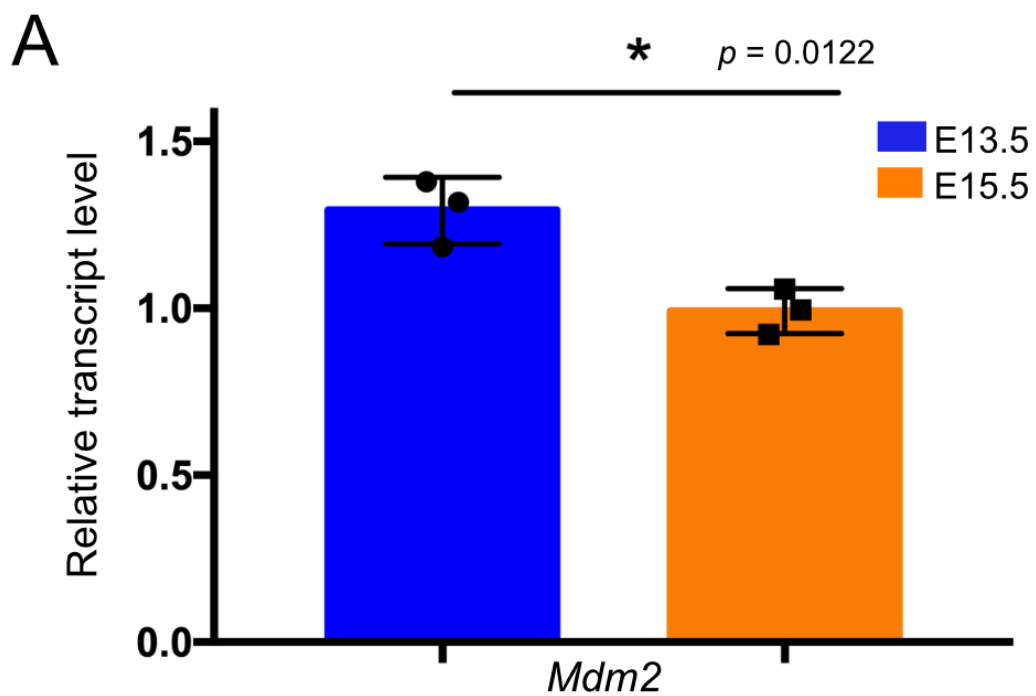

**Figure S4. *Mdm2* expression is downregulated following development.**

(A) qRT-PCR of *Mdm2* expression in wildtype lungs at E13.5 and E15.5. Data in this figure is from  $n = 3$  embryos of each stage.

**Table S1. qRT-PCR primers used in this study**

|                               |                                                                    |
|-------------------------------|--------------------------------------------------------------------|
| <i>Actb</i> ( $\beta$ -actin) | 5'-CGGCCAGGTCATCACTATTGGCAAC-3'<br>5'-GCCACAGGATTCCATACCCAAGAAG-3' |
| <i>Sftpc</i>                  | 5'-ATGGACATGAGTAGCAAAGAGGT-3'<br>5'-CACGATGAGAAGGCGTTTTGAG-3'      |
| <i>Hopx</i>                   | 5'-CCACGCTGTGCCTCATCGCA-3'<br>5'-GGCCTGGCTCCCTAGTCCGT-3'           |
| <i>Scgb1a1</i>                | 5'-CTCCTATGCCACTCTCATCTGC-3'<br>5'-GACAGGTTGTGGCGGATGGAAT-3'       |
| <i>Foxj1</i>                  | 5'-ATGAAGATCGCCATCACAATCAC-3'<br>5'-GGATGCCACATAACCAGACTCT-3'      |
| <i>Mdm2</i>                   | 5'-CCAGGCCAATGTGCAATACC-3'<br>5'-ATGGTTTTTGGTCTAACCAGAGT-3'        |
